# Supplementary material
Source: PubMed Central journal article supplement (PMC3993788)
Supplement: JVI.03805-13_zjv999098902so1.pdf [file JVI.03805-13_zjv999098902so1.pdf]

**Supplementary Table S1.** Representative contemporary H3N2 influenza A hemagglutinin (HA) and neuraminidase (NA) sequences and sequences for viruses used in the HI-assay. NCBI Genbank ([www.ncbi.nlm.nih.gov/](http://www.ncbi.nlm.nih.gov/)) or GISAID EpiFlu ([www.gisaid.org](http://www.gisaid.org)) accession numbers and isolate name are provided.

| HA Genbank Accession | NA Genbank Accession | Isolate Name                    | Originating lab                                          |
|----------------------|----------------------|---------------------------------|----------------------------------------------------------|
| CY039087             | CY035024             | A/Brisbane/10/2007              |                                                          |
| CY088483             | CY088485             | A/Fujian/411/2002               |                                                          |
| JN638733             | JN638732             | A/Indiana/08/2011               |                                                          |
| EPI_ISL_123206       | EPI_ISL_123206       | A/Indiana/12/2012               | Indiana State Department of Health Laboratories, and CDC |
| AY531035             | DQ487331             | A/Moscow/10/99                  |                                                          |
| EPI_ISL_123207       | EPI_ISL_123207       | A/Ohio/13/2012                  | Ohio Department of Health Laboratories, and CDC          |
| GQ293081             | GQ293082             | A/Perth/16/2009                 |                                                          |
| AF268128             | AF268138             | A/Swine/Colorado/23619/99       |                                                          |
| KF739390             | KF739392             | A/Swine/Illinois/02907/2009     |                                                          |
| CY107066             | CY107068             | A/swine/Illinois/A01201606/2011 |                                                          |
| JX422557             | JX422556             | A/swine/Illinois/A01241066/2012 |                                                          |
| JX422497             | JX422496             | A/swine/Illinois/A01241469/2012 |                                                          |
| KC222299             | KC222298             | A/swine/Illinois/A01271623/2012 |                                                          |
| KC822383             | KC822382             | A/swine/Illinois/A01445725/2013 |                                                          |
| JX534982             | JX534984             | A/swine/Indiana/A00968373/2012  |                                                          |
| JX092535             | JX092572             | A/swine/Indiana/A01202866/2011  |                                                          |
| KC676308             | KC676309             | A/swine/Indiana/A01260185/2013  |                                                          |
| CY099027             | CY099029             | A/swine/Iowa/01700/2007         |                                                          |
| CY040516             | CY040517             | A/swine/Iowa/36243/2005         |                                                          |
| AF251411             | AF251412.3           | A/Swine/Iowa/533/99             |                                                          |
| JN652493             | JN652524             | A/swine/Iowa/A01049750/2011     |                                                          |
| JX092307             | JX092356             | A/swine/Iowa/A01202613/2011     |                                                          |
| JX092542             | JX092579             | A/swine/Iowa/A01202889/2011     |                                                          |
| JX092555             | JX092592             | A/swine/Iowa/A01203121/2012     |                                                          |
| JQ739697             | JQ739709             | A/swine/Iowa/A01203196/2012     |                                                          |

|          |          |                                       |
|----------|----------|---------------------------------------|
| JQ739698 | JQ739710 | A/swine/Iowa/A01203197/2012           |
| JX658776 | JX658778 | A/swine/Iowa/A01203751/2012           |
| JX657018 | JX657017 | A/swine/Iowa/A01300195/2012           |
| KC755694 | KC755693 | A/swine/Iowa/A01432500/2013           |
| GU135941 | GU135943 | A/swine/Iowa/H03LDH5/2003             |
| JX163265 | JX163276 | A/swine/Michigan/A01203498/2012       |
| JX442056 | JX442058 | A/swine/Michigan/A01259000/2012       |
| KC839567 | KC839569 | A/swine/Michigan/A01259034/2012       |
| KC534987 | KC534986 | A/swine/Michigan/A01432375/2013       |
| CY099247 | CY099249 | A/swine/Minnesota/00484/2005          |
| CY099061 | CY099063 | A/swine/Minnesota/00709/2005          |
| CY099035 | CY099037 | A/swine/Minnesota/01146/2006          |
| CY099103 | CY099105 | A/swine/Minnesota/02782/2009          |
| HQ315643 | FJ519965 | A/swine/Minnesota/1300/2007           |
| JX401343 | JX401345 | A/swine/Minnesota/14/2012             |
| JX853749 | JX853751 | A/swine/Minnesota/18/2012             |
| FJ519976 | FJ519966 | A/swine/Minnesota/5947/2007           |
| JX422257 | JX422256 | A/swine/Minnesota/A01125993/2012      |
| KC576834 | KC576836 | A/swine/Minnesota/A01280462/2013      |
| KC589443 | KC589445 | A/swine/Minnesota/A01280592/2013      |
| JX657030 | JX657029 | A/swine/Minnesota/A01300213/2012      |
| JX422521 | JX422520 | A/swine/Minnesota/A01327922/2012      |
| KC715696 | KC715695 | A/swine/Minnesota/A01432433/2013      |
| KC841830 | KC841829 | A/swine/Minnesota/A01432544/2013      |
| AF251403 | AF251404 | A/Swine/Nebraska/209/98               |
| JX422575 | JX422574 | A/swine/Nebraska/A01241171/2012       |
| KC222305 | KC222304 | A/swine/Nebraska/A01271549/2012       |
| CY040538 | CY040539 | A/swine/North Carolina/38715/2005     |
| KC841842 | KC841841 | A/swine/North Carolina/A01432566/2013 |
| JN940422 | JN940424 | A/swine/NY/A01104005/2011             |

|          |                |                                     |                                                                       |
|----------|----------------|-------------------------------------|-----------------------------------------------------------------------|
| AF268123 | AF268136       | A/Swine/Oklahoma/18717/99           |                                                                       |
| JF263535 | JX657759       | A/swine/Pennsylvania/A01076777/2010 |                                                                       |
| KC526198 | KC526200       | A/swine/South Dakota/A01280095/2013 |                                                                       |
| CY095675 | CY095677       | A/swine/Texas/4199-2/1998           |                                                                       |
| JN652507 | JN652541       | A/swine/Texas/A01049914/2011        |                                                                       |
| AF268126 | AF268137       | A/Swine/Wisconsin/14094/99          |                                                                       |
| KC562197 | KC562196       | A/swine/Wyoming/A01444562/2013      |                                                                       |
| CY039079 | AJ291403       | A/Sydney/5/1997                     |                                                                       |
| JN706700 | JN706702       | A/turkey/Ontario/FAV-10/2011        |                                                                       |
| JN683629 | JN683631       | A/turkey/Ontario/FAV-9/2011         |                                                                       |
| JX905419 | JX905418       | A/Utah/10/2012                      |                                                                       |
| KC306165 | EPI_ISL_101506 | A/Victoria/361/2011                 | WHO Collaborating Centre for Reference and Research on Influenza, AUS |
| CY034116 | CY034118       | A/Wisconsin/67/2005                 |                                                                       |
| AY661190 | U51246         | A/Wuhan/359/95                      |                                                                       |

---

**Supplementary Table S2.** All U.S. swine IAV H3N2 HA sequences from 1977 to present downloaded from the Influenza Virus Resource on July 2, 2013.

| HA Genbank<br>Accession | Isolate Name                        | Originating lab |
|-------------------------|-------------------------------------|-----------------|
| M73774                  | A/swine/Colorado/1/1977             |                 |
| AF153232                | A/Swine/NorthCarolina/35922/98      |                 |
| AF153233                | A/swine/Texas/4199-2/1998           |                 |
| AF153234                | A/Swine/Minnesota/9088-2/98         |                 |
| AF153235                | A/Swine/Iowa/8548-1/98              |                 |
| AF251403                | A/Swine/Nebraska/209/98             |                 |
| AF251411                | A/Swine/Iowa/533/99                 |                 |
| AF251419                | A/Swine/Iowa/569/99                 |                 |
| AF268123                | A/Swine/Oklahoma/18717/99           |                 |
| AF268124                | A/Swine/Illinois/21587/99           |                 |
| AF268125                | A/Swine/Oklahoma/18089/99           |                 |
| AF268126                | A/Swine/Wisconsin/14094/99          |                 |
| AF268127                | A/Swine/NorthCarolina/16497/99      |                 |
| AF268128                | A/Swine/Colorado/23619/99           |                 |
| CY009308                | A/swine/Wisconsin/194/1980          |                 |
| CY009300                | A/swine/Colorado/1/1977             |                 |
| AF251427                | A/Swine/Minnesota/593/99            |                 |
| EF551053                | A/swine/NorthCarolina/2003          |                 |
| EU422987                | A/swine/Iowa/H02AS8/2002            |                 |
| EU422988                | A/swine/Iowa/H03HO7/2003            |                 |
| CY035416                | A/swine/Minnesota/SG234/2005        |                 |
| CY035419                | A/swine/Minnesota/SG235/2007        |                 |
| CY035422                | A/swine/Minnesota/SG236/2007        |                 |
| CY035426                | A/swine/Minnesota/SG237/2007        |                 |
| CY035442                | A/swine/Minnesota/SG242/2006        |                 |
| FJ410140                | A/swine/Minnesota/1145/2007         |                 |
| FJ519971                | A/swine/Minnesota/65767/2006        |                 |
| FJ519972                | A/swine/Minnesota/66853/2006        |                 |
| FJ519973                | A/swine/Minnesota/66960/2006        |                 |
| FJ519974                | A/swine/Minnesota/578/2007          |                 |
| FJ519975                | A/swine/Minnesota/761/2007          |                 |
| FJ519976                | A/swine/Minnesota/5947/2007         |                 |
| FJ519977                | A/swine/Minnesota/7931/2007         |                 |
| CY040459                | A/swine/Arkansas/63607-20/2008      |                 |
| CY040462                | A/swine/Illinois/63607-18/2008      |                 |
| CY040463                | A/swine/Illinois/63607-2/2008       |                 |
| CY040464                | A/swine/Illinois/63607-22/2008      |                 |
| CY040465                | A/swine/Illinois/63607-36/2008      |                 |
| CY040469                | A/swine/Iowa/63607-13/2008          |                 |
| CY040470                | A/swine/Iowa/63607-19/2008          |                 |
| CY040484                | A/swine/Minnesota/63607-29/2008     |                 |
| CY040498                | A/swine/NorthCarolina/225-7/2008    |                 |
| CY040506                | A/swine/NorthCarolina/63607-38/2008 |                 |

|          |                                    |
|----------|------------------------------------|
| CY040511 | A/swine/Oklahoma/225-14/2008       |
| CY040516 | A/swine/Iowa/36243/2005            |
| CY040518 | A/swine/Illinois/34642/2005        |
| CY040538 | A/swine/NorthCarolina/38715/2005   |
| CY040581 | A/swine/Iowa/36241/2005            |
| CY040582 | A/swine/Minnesota/18815/2005       |
| CY040583 | A/swine/Minnesota/21057/2005       |
| CY040584 | A/swine/Minnesota/24877/2005       |
| CY040585 | A/swine/Missouri/36702/2005        |
| CY045551 | A/swine/Oklahoma/001142/2009       |
| CY045559 | A/swine/Kansas/015252/2009         |
| CY045567 | A/swine/Oklahoma/008722/2007       |
| CY045575 | A/swine/Oklahoma/011506/2007       |
| GU135941 | A/swine/Iowa/H03LDH5/2003          |
| GU135918 | A/swine/Iowa/H03HB4/2003           |
| GU135891 | A/swine/Iowa/H03BF5/2003           |
| GU289666 | A/swine/Wisconsin/R7c/2001         |
| GU721165 | A/swine/Illinois/02945/2010        |
| GU565035 | A/swine/Illinois/02940/2010        |
| GU817053 | A/swine/Minnesota/02948/2009       |
| GU817057 | A/swine/Minnesota/02952/2009       |
| GU968905 | A/swine/Minnesota/02981/2010       |
| HM025943 | A/swine/Missouri/02980/2010        |
| HM217202 | A/swine/Minnesota/03008/2010       |
| HM570052 | A/swine/Iowa/03017/2010            |
| HM778115 | A/swine/Illinois/03040/2010        |
| HM778116 | A/swine/Illinois/03041/2010        |
| HQ315643 | A/swine/Minnesota/1300/2007        |
| HQ734186 | A/swine/Illinois/53612-1/2009      |
| HQ734189 | A/swine/Illinois/53612-2/2009      |
| HQ734192 | A/swine/Illinois/53612-3/2009      |
| HQ734195 | A/swine/Illinois/53612-4/2009      |
| HQ734198 | A/swine/Illinois/53612-5/2009      |
| HQ734201 | A/swine/Illinois/53612-6/2010      |
| HQ734204 | A/swine/Illinois/53612-7/2010      |
| JF263535 | A/swine/Pennsylvania/62170-1/2010  |
| JF263536 | A/swine/Pennsylvania/62170-3/2010  |
| JF316643 | A/swine/Pennsylvania/057108-1/2010 |
| JF312071 | A/swine/Iowa/A01057188/2010        |
| JF312072 | A/swine/Illinois/A01057087/2010    |
| JF312073 | A/swine/Illinois/A01057088/2010    |
| CY086920 | A/swine/Minnesota/239105/2009      |
| JF312064 | A/swine/Pennsylvania/62170-2/2010  |
| JF312065 | A/swine/Pennsylvania/62170-4/2010  |
| JF812274 | A/swine/Iowa/A01049031/2010        |
| JF812275 | A/swine/Iowa/A01049032/2010        |
| JF812276 | A/swine/Iowa/A01049034/2010        |
| JF812277 | A/swine/Iowa/A01049035/2010        |

|          |                                      |
|----------|--------------------------------------|
| JF812289 | A/swine/Indiana/A01049091/2010       |
| JF812293 | A/swine/Iowa/A01049112/2010          |
| JF833334 | A/swine/Iowa/A01049113/2010          |
| JF833336 | A/swine/Indiana/A01049124/2010       |
| JF833340 | A/swine/Iowa/A01049160/2010          |
| JF833345 | A/swine/Iowa/A01049185/2010          |
| JN162046 | A/swine/Nebraska/A01049235/2010      |
| JN162051 | A/swine/Iowa/A01049254/2010          |
| JN162052 | A/swine/Pennsylvania/A01049256/2010  |
| JN162053 | A/swine/Iowa/A01049317/2010          |
| JN162054 | A/swine/Minnesota/A01049346/2010     |
| JN162059 | A/swine/NorthCarolina/A01049436/2011 |
| CY095675 | A/swine/Texas/4199-2/1998            |
| JN409391 | A/swine/Kansas/10-91088/2010         |
| JN409399 | A/swine/Kansas/11-101926/2011        |
| JN409407 | A/swine/Kansas/11-104465/2011        |
| JN409415 | A/swine/Kansas/11-104467/2011        |
| JN409423 | A/swine/Kansas/11-107824/2011        |
| JN409431 | A/swine/Kansas/11-109700/2011        |
| JN409439 | A/swine/Kansas/11-110529/2011        |
| CY099027 | A/swine/Iowa/01700/2007              |
| CY099035 | A/swine/Minnesota/01146/2006         |
| CY099061 | A/swine/Minnesota/00709/2005         |
| CY099103 | A/swine/Minnesota/02782/2009         |
| CY099111 | A/swine/Minnesota/01862/2007         |
| CY099143 | A/swine/Minnesota/00611/2005         |
| CY099215 | A/swine/Minnesota/001444/2007        |
| CY099231 | A/swine/Minnesota/001332/2006        |
| CY099247 | A/swine/Minnesota/00484/2005         |
| JN652491 | A/swine/Indiana/A01049744/2011       |
| JN652492 | A/swine/Indiana/A01049745/2011       |
| JN652493 | A/swine/Iowa/A01049750/2011          |
| JN652507 | A/swine/Texas/A01049914/2011         |
| JN652508 | A/swine/Texas/A01049915/2011         |
| JN652510 | A/swine/Minnesota/A01049936/2011     |
| JN652511 | A/swine/Nebraska/A01049937/2011      |
| JN652407 | A/swine/Texas/A01049555/2011         |
| JN652408 | A/swine/Texas/A01049556/2011         |
| JN652415 | A/swine/Indiana/A01049653/2011       |
| JN940422 | A/swine/NY/A01104005/2011            |
| JQ350538 | A/swine/Iowa/A01202709/2011          |
| JQ350530 | A/swine/Iowa/A01202659/2011          |
| JQ350522 | A/swine/Iowa/A01202640/2011          |
| CY107015 | A/swine/NorthCarolina/A01076178/2009 |
| CY107020 | A/swine/Indiana/A01076191/2010       |
| CY107028 | A/swine/Minnesota/A01076196/2010     |
| CY107035 | A/swine/NorthCarolina/A01076199/2010 |
| CY107043 | A/swine/NorthCarolina/A01076204/2010 |

|          |                                      |
|----------|--------------------------------------|
| CY107051 | A/swine/NorthCarolina/A01076212/2010 |
| CY107058 | A/swine/Minnesota/A01076218/2010     |
| CY107066 | A/swine/Illinois/A01201606/2011      |
| JQ398784 | A/swine/NorthCarolina/A01202766/2011 |
| JQ398788 | A/swine/NorthCarolina/A01048779/2011 |
| JQ661488 | A/swine/NorthCarolina/A01202768/2011 |
| JQ689163 | A/swine/Indiana/A01049349/2010       |
| JQ689155 | A/swine/Indiana/A00968322/2010       |
| JQ689153 | A/swine/Indiana/A00968321/2010       |
| JQ689165 | A/swine/Illinois/A01076719/2010      |
| JQ689160 | A/swine/Illinois/A01047528/2010      |
| JQ689157 | A/swine/Illinois/A01047183/2010      |
| JQ689148 | A/swine/Iowa/A01202088/2011          |
| JQ689140 | A/swine/Nebraska/A01104010/2011      |
| JQ689132 | A/swine/Iowa/A01049036/2010          |
| JQ689124 | A/swine/Iowa/A01049033/2010          |
| JQ689116 | A/swine/Missouri/A01047969/2010      |
| JQ689108 | A/swine/Missouri/A01047968/2010      |
| JQ689100 | A/swine/Illinois/A01047529/2010      |
| JQ689092 | A/swine/Minnesota/A01047396/2011     |
| JQ689084 | A/swine/Illinois/A01047188/2010      |
| JQ738179 | A/swine/Illinois/A00857304b/2012     |
| JQ738171 | A/swine/Illinois/A00857304a/2012     |
| JQ738163 | A/swine/Illinois/A00857138b/2011     |
| JQ738155 | A/swine/Illinois/A00857138a/2011     |
| JQ738147 | A/swine/Illinois/A00857300/2011      |
| JQ738139 | A/swine/Pennsylvania/a01076503/2010  |
| JQ738131 | A/swine/Pennsylvania/a01076502/2010  |
| JQ739697 | A/swine/Iowa/A01203196/2012          |
| JQ739698 | A/swine/Iowa/A01203197/2012          |
| JQ756375 | A/swine/Illinois/A01076865/2010      |
| JQ756376 | A/swine/Minnesota/A01134337/2010     |
| JQ756377 | A/swine/Missouri/A01240017/2011      |
| JQ756378 | A/swine/Minnesota/A01240088/2011     |
| JQ756379 | A/swine/Minnesota/A01240095/2011     |
| JQ756380 | A/swine/Minnesota/A01240127/2011     |
| JQ783061 | A/swine/Minnesota/A00907734/2011     |
| JQ783062 | A/swine/Iowa/A01047906/2010          |
| JQ783063 | A/swine/Pennsylvania/A01047912/2010  |
| JQ783064 | A/swine/NorthCarolina/A01047914/2011 |
| JQ783065 | A/swine/NorthCarolina/A01076214/2010 |
| JQ783066 | A/swine/Iowa/A01076311/2010          |
| JQ783067 | A/swine/Iowa/A01076630/2010          |
| JQ783068 | A/swine/Iowa/A01076632/2010          |
| JQ783069 | A/swine/Minnesota/A01076701/2010     |
| JQ783070 | A/swine/Illinois/A01076859/2010      |
| JQ783071 | A/swine/Minnesota/A01116195/2011     |
| JQ783072 | A/swine/Minnesota/A01116200/2011     |

|          |                                                  |
|----------|--------------------------------------------------|
| JQ783073 | A/swine/Nebraska/A01116980/2011                  |
| JQ783074 | A/swine/Illinois/A01201076/2011                  |
| JQ783075 | A/swine/Minnesota/A01201437/2011                 |
| JQ783076 | A/swine/Pennsylvania/A01201666/2011              |
| JQ783077 | A/swine/Illinois/A01201770/2011                  |
| JQ783078 | A/swine/Minnesota/A01201894/2011                 |
| JQ791012 | A/swine/Minnesota/A01076999/2010                 |
| JQ791004 | A/swine/Illinois/A01047014/2010                  |
| JQ790996 | A/swine/Illinois/A01047009/2010                  |
| CY116624 | A/swine/Minnesota/A01240557/2011                 |
| JQ922312 | A/swine/Illinois/A01076708/2010                  |
| JQ922327 | A/swine/Missouri/A01240016/2011                  |
| CY041847 | A/swine/NorthCarolina/R08-001877-D08-013371/2008 |
| JX042530 | A/swine/Minnesota/A01076193/2010                 |
| JX042538 | A/swine/Iowa/A01076309/2010                      |
| JX042540 | A/swine/Iowa/A01076507/2010                      |
| JX042541 | A/swine/Iowa/A01076508/2010                      |
| JX042542 | A/swine/Minnesota/A01076531/2010                 |
| JX042543 | A/swine/Illinois/A01076709/2010                  |
| JX042544 | A/swine/Illinois/A01076724/2010                  |
| JX042545 | A/swine/Illinois/A01076730/2010                  |
| JX042546 | A/swine/Illinois/A01076735/2010                  |
| JX042547 | A/swine/Illinois/A01076768/2010                  |
| JX042552 | A/swine/Illinois/A01201633/2011                  |
| JX080531 | A/swine/Iowa/A01203304/2012                      |
| JX080538 | A/swine/Indiana/A01203372/2012                   |
| JX080548 | A/swine/Virginia/A01203436/2012                  |
| JX080549 | A/swine/Virginia/A01203437/2012                  |
| JX080553 | A/swine/Iowa/A01203459/2012                      |
| JX080554 | A/swine/Iowa/A01203463/2012                      |
| JX080557 | A/swine/Iowa/A01243311/2012                      |
| JX080619 | A/swine/Iowa/A01049119/2010                      |
| JX092272 | A/swine/Iowa/A01202089/2011                      |
| JX092297 | A/swine/Iowa/A01202529/2011                      |
| JX092298 | A/swine/Iowa/A01202530/2011                      |
| JX092300 | A/swine/Iowa/A01202573/2011                      |
| JX092307 | A/swine/Iowa/A01202613/2011                      |
| JX092308 | A/swine/Iowa/A01202614/2011                      |
| JX092311 | A/swine/Indiana/A01202621/2011                   |
| JX092316 | A/swine/Iowa/A01202639/2011                      |
| JX092415 | A/swine/Michigan/A01202655/2011                  |
| JX092416 | A/swine/Iowa/A01202657/2011                      |
| JX092417 | A/swine/Iowa/A01202658/2011                      |
| JX092444 | A/swine/Illinois/A01202825/2011                  |
| JX092535 | A/swine/Indiana/A01202866/2011                   |
| JX092536 | A/swine/Indiana/A01202867/2011                   |
| JX092537 | A/swine/Iowa/A01202878/2011                      |
| JX092538 | A/swine/Iowa/A01202879/2011                      |



|          |                                      |
|----------|--------------------------------------|
| JX092542 | A/swine/Iowa/A01202889/2011          |
| JX092544 | A/swine/Iowa/A01202905/2011          |
| JX092545 | A/swine/Iowa/A01202906/2011          |
| JX092549 | A/swine/Illinois/A01202978/2011      |
| JX092552 | A/swine/Iowa/A01203104/2011          |
| JX092555 | A/swine/Iowa/A01203121/2012          |
| JX092561 | A/swine/Ohio/A01203186/2012          |
| JX092569 | A/swine/Iowa/A01203248/2012          |
| JX092570 | A/swine/NorthCarolina/A01203272/2012 |
| JX090162 | A/swine/Illinois/A01201763/2011      |
| JX099413 | A/swine/Illinois/A00857318a/2012     |
| CY121886 | A/swine/Ohio/1/2012                  |
| CY122052 | A/swine/Minnesota/2/2012             |
| CY122318 | A/swine/SouthDakota/3/2012           |
| CY122321 | A/swine/Minnesota/4/2012             |
| CY122327 | A/swine/Ohio/6/2012                  |
| CY114592 | A/swine/Minnesota/A01201424/2010     |
| CY114798 | A/swine/Illinois/A01201077/2011      |
| CY114840 | A/swine/Illinois/A01201606/2011      |
| CY114846 | A/swine/Illinois/A01201629/2011      |
| CY114849 | A/swine/Illinois/A01201631/2011      |
| CY114857 | A/swine/Minnesota/A01201895/2011     |
| CY114874 | A/swine/Minnesota/A00907733/2011     |
| CY114884 | A/swine/Illinois/A01116190/2011      |
| CY114909 | A/swine/Minnesota/A01116381/2011     |
| CY114952 | A/swine/Nebraska/A01116984/2011      |
| CY124830 | A/swine/Ohio/9/2012                  |
| CY124833 | A/swine/Ohio/7/2012                  |
| CY124839 | A/swine/Pennsylvania/A01076501/2010  |
| JX163262 | A/swine/Iowa/A01203482/2012          |
| JX163264 | A/swine/Iowa/A01203492/2012          |
| JX163265 | A/swine/Michigan/A01203498/2012      |
| JX163266 | A/swine/Iowa/A01203503/2012          |
| JX163268 | A/swine/Indiana/A01203509/2012       |
| JX163269 | A/swine/Minnesota/A01203517/2012     |
| JX163270 | A/swine/Indiana/A01203521/2012       |
| JX163271 | A/swine/Indiana/A01203522/2012       |
| JX273046 | A/swine/Nebraska/A01300032/2012      |
| JX267175 | A/swine/Iowa/A01203571/2012          |
| JX280444 | A/swine/Minnesota/A01125995/2012     |
| JX280450 | A/swine/Texas/A01104013/2012         |
| JX401343 | A/swine/Minnesota/14/2012            |
| JX442056 | A/swine/Michigan/A01259000/2012      |
| JX444786 | A/swine/Iowa/A01203612/2012          |
| JX444787 | A/swine/Ohio/A01203624/2012          |
| JX463278 | A/swine/Indiana/A01327236/2010       |
| JX463284 | A/swine/Indiana/A01327235/2010       |
| JX463287 | A/swine/Indiana/A01327234/2010       |

|          |                                  |
|----------|----------------------------------|
| JX494412 | A/swine/Indiana/A00968380/2012   |
| JX543519 | A/swine/Illinois/A01203672/2012  |
| JX534998 | A/swine/Indiana/A00968379/2012   |
| JX534990 | A/swine/Indiana/A00968376/2012   |
| JX534982 | A/swine/Indiana/A00968373/2012   |
| JX534974 | A/swine/Indiana/A00968370/2012   |
| JX534969 | A/swine/Ohio/12TOSU293/2012      |
| JX534961 | A/swine/Ohio/12TOSU268/2012      |
| CY116566 | A/swine/Wisconsin/H02AS8/2002    |
| JX549145 | A/swine/Indiana/A00968386/2012   |
| JX549137 | A/swine/Indiana/A01104030/2012   |
| JX549130 | A/swine/Indiana/A01104029/2012   |
| JX549123 | A/swine/Indiana/A01104023/2012   |
| JX549115 | A/swine/Indiana/A01104016/2012   |
| JX565513 | A/swine/Ohio/12TOSU420/2012      |
| JX565505 | A/swine/Ohio/12TOSU307/2012      |
| JX565497 | A/swine/Ohio/12TOSU447/2012      |
| JX565489 | A/swine/Ohio/12TOSU450/2012      |
| JX565481 | A/swine/Ohio/12TOSU464/2012      |
| JX565473 | A/swine/Ohio/12TOSU467/2012      |
| JX565426 | A/swine/Minnesota/16/2012        |
| JX565710 | A/swine/Minnesota/17/2012        |
| JX422224 | A/swine/Illinois/A01241212/2012  |
| JX422248 | A/swine/Illinois/A01241916/2012  |
| JX422257 | A/swine/Minnesota/A01125993/2012 |
| JX422260 | A/swine/Nebraska/A01241114/2012  |
| JX422275 | A/swine/Missouri/A01241610/2012  |
| JX422284 | A/swine/Montana/A01327551/2012   |
| JX422311 | A/swine/Illinois/A01327868/2012  |
| JX422329 | A/swine/Missouri/A01241619/2012  |
| JX422335 | A/swine/Illinois/A01240891/2012  |
| JX422338 | A/swine/Illinois/A01241871/2012  |
| JX422341 | A/swine/Indiana/A01327215/2012   |
| JX422347 | A/swine/Minnesota/A01327763/2012 |
| JX422359 | A/swine/Illinois/A01240835/2012  |
| JX422374 | A/swine/Minnesota/A01327921/2012 |
| JX422377 | A/swine/Nebraska/A01241785/2012  |
| JX422380 | A/swine/Minnesota/A01327764/2012 |
| JX422383 | A/swine/Oklahoma/A01327676/2012  |
| JX422386 | A/swine/Illinois/A01327396/2012  |
| JX422395 | A/swine/Illinois/A01241065/2012  |
| JX422410 | A/swine/Minnesota/A01328452/2012 |
| JX422413 | A/swine/Illinois/A01327903/2012  |
| JX422416 | A/swine/Indiana/A01327213/2012   |
| JX422425 | A/swine/Illinois/A01241208/2012  |
| JX422428 | A/swine/Illinois/A01327905/2012  |
| JX422431 | A/swine/Minnesota/A01125992/2012 |
| JX422470 | A/swine/Nebraska/A01327581/2012  |

|          |                                      |
|----------|--------------------------------------|
| JX422479 | A/swine/Montana/A01327552/2012       |
| JX422497 | A/swine/Illinois/A01241469/2012      |
| JX422500 | A/swine/Minnesota/A01327769/2012     |
| JX422515 | A/swine/Illinois/A01327629/2012      |
| JX422521 | A/swine/Minnesota/A01327922/2012     |
| JX422524 | A/swine/Illinois/A01241842/2012      |
| JX422533 | A/swine/Nebraska/A01327747/2012      |
| JX422536 | A/swine/Minnesota/A01327768/2012     |
| JX422548 | A/swine/Illinois/A01327184/2012      |
| JX422551 | A/swine/Illinois/A01241876/2012      |
| JX422554 | A/swine/Illinois/A01241840/2012      |
| JX422557 | A/swine/Illinois/A01241066/2012      |
| JX422566 | A/swine/Illinois/A01240836/2012      |
| JX422575 | A/swine/Nebraska/A01241171/2012      |
| JX422578 | A/swine/Minnesota/A01328451/2012     |
| JX647377 | A/swine/Iowa/A01243736/2012          |
| JX656961 | A/swine/Nebraska/A01300022/2012      |
| JX656973 | A/swine/Minnesota/A01300160/2012     |
| JX656991 | A/swine/Nebraska/A01300475/2012      |
| JX657000 | A/swine/Iowa/A01300451/2012          |
| JX657003 | A/swine/Iowa/A01300194/2012          |
| JX657006 | A/swine/Minnesota/A01301345/2012     |
| JX657009 | A/swine/Nebraska/A01300467/2012      |
| JX657015 | A/swine/Minnesota/A01300992/2012     |
| JX657018 | A/swine/Iowa/A01300195/2012          |
| JX657030 | A/swine/Minnesota/A01300213/2012     |
| JX657033 | A/swine/Minnesota/A01301346/2012     |
| JX657039 | A/swine/NorthCarolina/A01300820/2012 |
| JX658775 | A/swine/Colorado/A01203748/2012      |
| JX658776 | A/swine/Iowa/A01203751/2012          |
| JX657719 | A/swine/Nebraska/A01240867/2012      |
| JX657728 | A/swine/Minnesota/A01301000/2012     |
| JX657734 | A/swine/Minnesota/A01327666/2012     |
| JX657740 | A/swine/Nebraska/A01240337/2011      |
| JX657749 | A/swine/Illinois/A01240775/2012      |
| JX657751 | A/swine/Minnesota/A01240792/2012     |
| JX657759 | A/swine/Pennsylvania/A01076777/2010  |
| JX657765 | A/swine/Illinois/A01240575/2011      |
| JX657768 | A/swine/Illinois/A01240578/2011      |
| JX657788 | A/swine/Illinois/A01240784/2012      |
| JX657797 | A/swine/Minnesota/A01300999/2012     |
| JX657817 | A/swine/Pennsylvania/A01076779/2010  |
| JX657823 | A/swine/SouthDakota/A01300602/2012   |
| JX657826 | A/swine/Illinois/A01240774/2012      |
| JX657838 | A/swine/Illinois/A01240908/2012      |
| JX853749 | A/swine/Minnesota/18/2012            |
| JX860656 | A/swine/Minnesota/A01301617/2012     |
| JX869492 | A/swine/Indiana/A00968390/2012       |

|          |                                      |
|----------|--------------------------------------|
| JX869498 | A/swine/Indiana/A00968397/2012       |
| JX869501 | A/swine/Indiana/A00968308/2012       |
| JX898902 | A/swine/Montana/21/2012              |
| JX908499 | A/swine/Minnesota/A01301665/2012     |
| JX952146 | A/swine/NorthCarolina/A01270394/2012 |
| JX964978 | A/swine/Ohio/A00152576/2012          |
| JX964970 | A/swine/Ohio/A01208457/2012          |
| JX964962 | A/swine/Wisconsin/A00677500/2012     |
| JX964954 | A/swine/Ohio/A01133464/2012          |
| JX964946 | A/swine/Ohio/A01133466/2012          |
| JX964938 | A/swine/Maryland/A01104048/2012      |
| JX964930 | A/swine/Maryland/A01104040/2012      |
| JX975010 | A/swine/Illinois/A01203812/2012      |
| JX975022 | A/swine/NorthCarolina/A01203801/2012 |
| JX975031 | A/swine/Iowa/A01203771/2012          |
| KC020473 | A/swine/Pennsylvania/A01104049/2012  |
| KC020452 | A/swine/Ohio/12TOSU527/2012          |
| KC020444 | A/swine/Ohio/12TOSU522/2012          |
| KC020436 | A/swine/Ohio/12TOSU484/2012          |
| KC020428 | A/swine/Ohio/12TOSU483/2012          |
| KC020420 | A/swine/Minnesota/A01301908/2012     |
| KC020407 | A/swine/Ohio/A00138552/2012          |
| KC134378 | A/swine/Iowa/A01203942/2012          |
| KC134381 | A/swine/Iowa/A01203872/2012          |
| KC134387 | A/swine/Iowa/A01203936/2012          |
| KC134399 | A/swine/Iowa/A01203943/2012          |
| KC134402 | A/swine/Iowa/A01203863/2012          |
| KC134408 | A/swine/Iowa/A01203954/2012          |
| KC139726 | A/swine/Minnesota/A01271014/2012     |
| KC139735 | A/swine/Minnesota/A01270872/2012     |
| KC139738 | A/swine/Minnesota/A01271001/2012     |
| KC139741 | A/swine/Nebraska/A01270879/2012      |
| KC146996 | A/swine/Iowa/A01203992/2012          |
| KC149917 | A/swine/Minnesota/A01271227/2012     |
| KC171942 | A/swine/Iowa/A01432077/2012          |
| KC171951 | A/swine/Iowa/A01432072/2012          |
| KC171954 | A/swine/Illinois/A01432127/2012      |
| KC167150 | A/swine/SouthDakota/A01267894/2012   |
| KC167165 | A/swine/Iowa/A01267939/2012          |
| KC171961 | A/swine/Minnesota/A01267989/2012     |
| KC167138 | A/swine/Indiana/A01260041/2012       |
| KC222220 | A/swine/Nebraska/A01271548/2012      |
| KC222226 | A/swine/Minnesota/A01271731/2012     |
| KC222299 | A/swine/Illinois/A01271623/2012      |
| KC222302 | A/swine/Minnesota/A01271443/2012     |
| KC222305 | A/swine/Nebraska/A01271549/2012      |
| KC238317 | A/swine/SouthDakota/A01279279/2012   |
| KC290723 | A/swine/Minnesota/A01279377/2012     |

|          |                                     |
|----------|-------------------------------------|
| KC310688 | A/swine/Indiana/A01260048/2012      |
| KC310691 | A/swine/Indiana/A01260093/2012      |
| KC310694 | A/swine/Indiana/A01260099/2012      |
| KC333093 | A/swine/Minnesota/A01277201/2012    |
| KC333114 | A/swine/Indiana/A01271853/2012      |
| KC261894 | A/swine/Indiana/A00968394/2012      |
| KC261886 | A/swine/Pennsylvania/A01104050/2012 |
| KC261878 | A/swine/Indiana/A00968398/2012      |
| KC261859 | A/swine/Iowa/A01244302/2012         |
| CY130677 | A/swine/Ohio/09SW73E/2009           |
| CY130685 | A/swine/Ohio/09SW74E/2009           |
| CY130693 | A/swine/Ohio/09SW77E/2009           |
| CY130701 | A/swine/Ohio/09SW79E/2009           |
| CY130709 | A/swine/Ohio/09SW63/2009            |
| CY130717 | A/swine/Ohio/09SW64/2009            |
| CY130725 | A/swine/Ohio/09SW65/2009            |
| CY130733 | A/swine/Ohio/09SW66/2009            |
| CY130741 | A/swine/Ohio/09SW69/2009            |
| CY130749 | A/swine/Ohio/09SW73M/2009           |
| CY130757 | A/swine/Ohio/09SW74M/2009           |
| CY130765 | A/swine/Ohio/09SW77M/2009           |
| CY130773 | A/swine/Ohio/09SW79M/2009           |
| CY130781 | A/swine/Ohio/09SW80/2009            |
| CY130789 | A/swine/Ohio/09SW83E/2009           |
| CY130797 | A/swine/Ohio/09SW100/2009           |
| CY130805 | A/swine/Ohio/09SW81/2009            |
| CY130813 | A/swine/Ohio/09SW82/2009            |
| CY130821 | A/swine/Ohio/09SW83M/2009           |
| CY130829 | A/swine/Ohio/09SW84/2009            |
| CY130837 | A/swine/Ohio/09SW85/2009            |
| CY130845 | A/swine/Ohio/09SW87/2009            |
| CY130853 | A/swine/Ohio/09SW88/2009            |
| CY130861 | A/swine/Ohio/09SW89/2009            |
| CY130869 | A/swine/Ohio/09SW90/2009            |
| CY130877 | A/swine/Ohio/09SW91/2009            |
| CY130885 | A/swine/Ohio/09SW92/2009            |
| CY130893 | A/swine/Ohio/09SW93/2009            |
| CY130901 | A/swine/Ohio/09SW94/2009            |
| CY130909 | A/swine/Ohio/09SW96/2009            |
| CY130917 | A/swine/Ohio/09SW97/2009            |
| CY130925 | A/swine/Ohio/09SW98/2009            |
| CY130933 | A/swine/Ohio/09SW99/2009            |
| CY130941 | A/swine/Ohio/10SW121/2010           |
| CY130949 | A/swine/Ohio/10SW122/2010           |
| CY130957 | A/swine/Ohio/10SW125/2010           |
| CY130965 | A/swine/Ohio/10SW126/2010           |
| CY130973 | A/swine/Ohio/10SW127/2010           |
| CY130981 | A/swine/Ohio/10SW128/2010           |

|          |                           |
|----------|---------------------------|
| CY130989 | A/swine/Ohio/10SW131/2010 |
| CY130997 | A/swine/Ohio/10SW132/2010 |
| CY131005 | A/swine/Ohio/10SW133/2010 |
| CY131013 | A/swine/Ohio/10SW134/2010 |
| CY131021 | A/swine/Ohio/10SW135/2010 |
| CY131029 | A/swine/Ohio/10SW136/2010 |
| CY131037 | A/swine/Ohio/10SW137/2010 |
| CY131045 | A/swine/Ohio/10SW139/2010 |
| CY131053 | A/swine/Ohio/10SW156/2010 |
| CY131061 | A/swine/Ohio/10SW202/2010 |
| CY131069 | A/swine/Ohio/10SW203/2010 |
| CY131077 | A/swine/Ohio/10SW204/2010 |
| CY131085 | A/swine/Ohio/10SW205/2010 |
| CY131093 | A/swine/Ohio/10SW206/2010 |
| CY131101 | A/swine/Ohio/10SW207/2010 |
| CY131109 | A/swine/Ohio/10SW208/2010 |
| CY131117 | A/swine/Ohio/10SW209/2010 |
| CY131125 | A/swine/Ohio/10SW210/2010 |
| CY131133 | A/swine/Ohio/10SW211/2010 |
| CY131141 | A/swine/Ohio/10SW212/2010 |
| CY131149 | A/swine/Ohio/10SW213/2010 |
| CY131157 | A/swine/Ohio/10SW214/2010 |
| CY131165 | A/swine/Ohio/10SW216/2010 |
| CY131173 | A/swine/Ohio/10SW218/2010 |
| CY131181 | A/swine/Ohio/10SW219/2010 |
| CY131189 | A/swine/Ohio/10SW220/2010 |
| CY131197 | A/swine/Ohio/11SW103/2011 |
| CY131205 | A/swine/Ohio/11SW108/2011 |
| CY131213 | A/swine/Ohio/11SW109/2011 |
| CY131221 | A/swine/Ohio/11SW112/2011 |
| CY131229 | A/swine/Ohio/11SW113/2011 |
| CY131237 | A/swine/Ohio/11SW114/2011 |
| CY131245 | A/swine/Ohio/11SW115/2011 |
| CY131253 | A/swine/Ohio/11SW118/2011 |
| CY131261 | A/swine/Ohio/11SW119/2011 |
| CY131269 | A/swine/Ohio/11SW87/2011  |
| CY131277 | A/swine/Ohio/11SW93/2011  |
| CY131285 | A/swine/Ohio/11SW94/2011  |
| CY131293 | A/swine/Ohio/11SW95/2011  |
| CY131301 | A/swine/Ohio/11SW96/2011  |
| CY131309 | A/swine/Ohio/11SW97/2011  |
| CY131317 | A/swine/Ohio/11SW98/2011  |
| CY131469 | A/swine/Ohio/11SW161/2011 |
| CY131477 | A/swine/Ohio/11SW163/2011 |
| CY131485 | A/swine/Ohio/11SW166/2011 |
| CY131503 | A/swine/Ohio/11SW169/2011 |
| CY131511 | A/swine/Ohio/11SW170/2011 |
| CY131529 | A/swine/Ohio/11SW172/2011 |

|          |                                      |
|----------|--------------------------------------|
| CY131537 | A/swine/Ohio/11SW173/2011            |
| CY131553 | A/swine/Ohio/11SW175/2011            |
| CY131571 | A/swine/Ohio/11SW179/2011            |
| CY131579 | A/swine/Ohio/11SW180/2011            |
| CY131587 | A/swine/Ohio/11SW183/2011            |
| CY131605 | A/swine/Ohio/11SW185/2011            |
| CY131613 | A/swine/Ohio/11SW186/2011            |
| CY131621 | A/swine/Ohio/11SW187/2011            |
| CY131639 | A/swine/Ohio/11SW191/2011            |
| CY131665 | A/swine/Ohio/11SW196/2011            |
| CY131673 | A/swine/Ohio/11SW197/2011            |
| CY131767 | A/swine/Ohio/11SW211/2011            |
| CY131957 | A/swine/Ohio/11SW347/2011            |
| KC355838 | A/swine/Iowa/A01277915/2012          |
| KC355812 | A/swine/Iowa/A01279512/2012          |
| KC405485 | A/swine/Minnesota/A01279722/2012     |
| KC405500 | A/swine/SouthDakota/A01279518/2012   |
| KC355802 | A/swine/Indiana/A01260135/2012       |
| KC435084 | A/swine/Tennessee/A01104055/2012     |
| KC435068 | A/swine/Michigan/A01259002/2012      |
| KC436068 | A/swine/Iowa/A01432207/2012          |
| KC436083 | A/swine/Illinois/A01244402/2012      |
| KC445205 | A/swine/Minnesota/A01442410/2012     |
| KC445235 | A/swine/NorthCarolina/A01442548/2012 |
| KC445238 | A/swine/Minnesota/A01442411/2012     |
| KC478974 | A/swine/Indiana/A01260140/2012       |
| KC478977 | A/swine/Indiana/A01260155/2012       |
| KC508578 | A/swine/Michigan/A01259003/2012      |
| KC491721 | A/swine/Minnesota/A01442898/2012     |
| KC534987 | A/swine/Michigan/A01432375/2013      |
| KC534996 | A/swine/Iowa/A01432271/2012          |
| KC534999 | A/swine/Indiana/A01432300/2013       |
| KC535005 | A/swine/Iowa/A01432308/2013          |
| KC562197 | A/swine/Wyoming/A01444562/2013       |
| KC562212 | A/swine/Maryland/A01444460/2013      |
| KC526198 | A/swine/SouthDakota/A01280095/2013   |
| KC571600 | A/swine/Indiana/A01260015/2012       |
| KC571606 | A/swine/Indiana/A01260163/2012       |
| KC571612 | A/swine/Indiana/A01260169/2012       |
| KC592052 | A/swine/Wyoming/A01444560/2013       |
| KC592058 | A/swine/Wyoming/A01444566/2013       |
| KC590647 | A/swine/Ohio/12TOSU363/2012          |
| KC590639 | A/swine/Ohio/12TOSU370/2012          |
| KC576834 | A/swine/Minnesota/A01280462/2013     |
| KC576837 | A/swine/Minnesota/A01280543/2013     |
| KC589443 | A/swine/Minnesota/A01280592/2013     |
| KC616720 | A/swine/Ohio/12TOSU371/2012          |
| KC616728 | A/swine/Ohio/12TOSU374/2012          |

|          |                                      |
|----------|--------------------------------------|
| KC620410 | A/swine/Iowa/A01432395/2013          |
| KC676308 | A/swine/Indiana/A01260185/2013       |
| KC715696 | A/swine/Minnesota/A01432433/2013     |
| KC715705 | A/swine/Minnesota/A01432462/2013     |
| KC748513 | A/swine/Wyoming/A01445296/2013       |
| KC748522 | A/swine/Wyoming/A01445305/2013       |
| KC735170 | A/swine/Ohio/A01280883/2013          |
| KC751551 | A/swine/Kansas/12-165022/2012        |
| KC751554 | A/swine/Kansas/13-105721a/2013       |
| KC755685 | A/swine/Indiana/A01432492/2013       |
| KC755694 | A/swine/Iowa/A01432500/2013          |
| KC785090 | A/swine/Minnesota/A01349160/2013     |
| KC813155 | A/swine/Iowa/321160/2012             |
| KC822383 | A/swine/Illinois/A01445725/2013      |
| KC839567 | A/swine/Michigan/A01259034/2012      |
| KC841830 | A/swine/Minnesota/A01432544/2013     |
| KC841842 | A/swine/NorthCarolina/A01432566/2013 |
| KC841845 | A/swine/Iowa/A01432529/2013          |
| KC844203 | A/swine/Ohio/A01349305/2013          |
| KC844206 | A/swine/Ohio/A01349302/2013          |
| KC844212 | A/swine/Ohio/A01349485/2013          |
| KC844215 | A/swine/Ohio/A01349495/2013          |
| KC849381 | A/swine/NorthCarolina/A01432584/2013 |
| KC855541 | A/swine/Ohio/12TOSU325/2012          |
| KC855533 | A/swine/Ohio/12TOSU318/2012          |
| KC855525 | A/swine/Ohio/12TOSU176/2012          |
| KC855517 | A/swine/Ohio/12TOSU129/2012          |
| KC855509 | A/swine/Ohio/12TOSU308/2012          |
| KC855501 | A/swine/Ohio/12TOSU138/2012          |
| KC855493 | A/swine/Ohio/12TOSU175/2012          |
| KC866582 | A/swine/Ohio/12TOSU50/2012           |
| KC866574 | A/swine/Ohio/12TOSU52/2012           |
| KC866534 | A/swine/Ohio/12TOSU409/2012          |
| KC866526 | A/swine/Ohio/12TOSU439/2012          |
| KC866518 | A/swine/Ohio/12TOSU411/2012          |
| KC866510 | A/swine/Ohio/12TOSU421/2012          |
| KC866486 | A/swine/Ohio/12TOSU433/2012          |
| KC866478 | A/swine/Ohio/12TOSU338/2012          |
| KC866454 | A/swine/Ohio/12TOSU333/2012          |
| KC881275 | A/swine/Ohio/A01349615/2013          |
| KC904786 | A/swine/Wyoming/A01379346/2013       |
| KC917308 | A/swine/Minnesota/A01349658/2013     |
| KC951211 | A/swine/Ohio/A01208180/2012          |
| KC951129 | A/swine/Wyoming/A01379354/2013       |
| KC951132 | A/swine/Wyoming/A01379327/2013       |
| KC951138 | A/swine/Pennsylvania/A01432652/2013  |
| KC984950 | A/swine/Indiana/A01260230/2013       |
| KC992248 | A/swine/Minnesota/A01379746/2013     |



KF007981 A/swine/Michigan/33261/2010  
 KF007982 A/swine/NorthCarolina/1026/2007  
 KF007983 A/swine/NorthCarolina/6368/2012  
 KF007984 A/swine/Nebraska/8534/2011  
 KF007985 A/swine/Nebraska/9330/2006  
 KF007986 A/swine/Indiana/9622/2011  
 KF007987 A/swine/Ohio/9753/2007  
 KF007988 A/swine/Iowa/11333/2006  
 KF007989 A/swine/Winconsin/12627/2009  
 KF007990 A/swine/Missouri/15808/2008  
 KF007991 A/swine/Iowa/18469/2009  
 KF007992 A/swine/NorthCarolina/23592/2009  
 KF007997 A/swine/Ohio/11SW111/2011  
 KF007998 A/swine/Ohio/11SW208/2011  
 KF007999 A/swine/Ohio/10SW215/2010  
 KF008000 A/swine/Ohio/10SW130/2010  
 KF037964 A/swine/Wyoming/A01380322/2013  
 KF059246 A/swine/Wyoming/A01380335/2013  
 KF059252 A/swine/Pennsylvania/A01380412/2013  
 KF113312 A/swine/Michigan/A01432678/2013  
 KF113318 A/swine/Iowa/A01432680/2013  
 KF113324 A/swine/Iowa/A01432731/2013  
 KF130904 A/swine/Ohio/11SW116/2011  
 KF135572 A/swine/Ohio/11SW349/2011  
 KF135564 A/swine/Ohio/11SW177/2011  
 KF135548 A/swine/Ohio/11SW111/2011  
 KF135524 A/swine/Ohio/11SW214/2011  
 KF135516 A/swine/Ohio/11SW344/2011  
 KF179104 A/swine/Indiana/A01260252/2013  
 KF179107 A/swine/Indiana/A01260254/2013  
 KF179110 A/swine/Indiana/A01260261/2013  
 KF179113 A/swine/Indiana/A01260268/2013  
 KF179116 A/swine/Indiana/A01260276/2013  
 KF179119 A/swine/Indiana/A01260280/2013  
 KF179125 A/swine/Indiana/A01260284/2013  
 KF179128 A/swine/Indiana/A01260285/2013  
 U07146 A/swine/Ange-Gardien/150/1990  
 CY088483 A/Fujian/411/2002  
 EPI\_ISL\_101506 A/Victoria/361/2011  
 GQ293081 A/Perth/16/2009  
 CY034116 A/Wisconsin/67/2005  
 CY039087 A/Brisbane/10/2007  
 AY661190 A/Wuhan/359/95  
 AY531035 A/Moscow/10/99  
 CY039079 A/Sydney/5/1997  
 JN683629 A/turkey/Ontario/FAV-9/2011  
 JN706700 A/turkey/Ontario/FAV-10/2011  
 JN638733 A/Indiana/08/2011

WHO Collaborating Centre for Reference and Research on Influenza, AUS

|                |                             |                                                          |
|----------------|-----------------------------|----------------------------------------------------------|
| JX905419       | A/Utah/10/2012              |                                                          |
| JN940422       | A/swine/NY/A01104005/2011   |                                                          |
| EPI_ISL_123207 | A/Ohio/13/2012              | Ohio Department of Health Laboratories, and CDC          |
| EPI_ISL_123206 | A/Indiana/12/2012           | Indiana State Department of Health Laboratories, and CDC |
| KF739390       | A/Swine/Illinois/02907/2009 |                                                          |

---

Table S3. Hemagglutination inhibition (HI) titers utilized in the antigenic cartography analyses.\*

Table with 57 columns and 57 rows. Each column and row is labeled with a specific H1N1vA strain (e.g., A\_H1N1vA\_MUHAN/0359/1995). The cells contain HI titers, often in bold text, representing the results of hemagglutination inhibition assays for each pair of strains.

\*Replicate tests reported as geometric mean titers.

| <b>Position</b> | <b>Human</b>                              | <b>Swine</b>                | <b>Equine</b> |
|-----------------|-------------------------------------------|-----------------------------|---------------|
| <b>145</b>      | N145K                                     | N145K<br>S145N/R            | N/D           |
| <b>155</b>      | T155Y<br>Y155H                            | H155Y<br>Y155H              | N/D           |
| <b>156</b>      | K156E<br>E156K<br>K156Q<br>Q156K<br>Q156H | N/S156K<br>N/S156H<br>N156K | N/D           |
| <b>158</b>      | G158E<br>E158K                            | N/D158G                     | N/D           |
| <b>159</b>      | S159Y                                     | Y159H<br>Y159N              | N159S         |
| <b>189</b>      | Q189K<br>K189R                            | K189R<br>K189R/S<br>K189E   | K189Q/E/D/N   |
| <b>193</b>      | N193S<br>D193N                            | N/D                         | N/D           |

Table S4. Amino acid positions and substitutions associated with antigenic evolution in three mammalian host species (compiled from references 26, 42, 45 and this study). N/D = not detected.

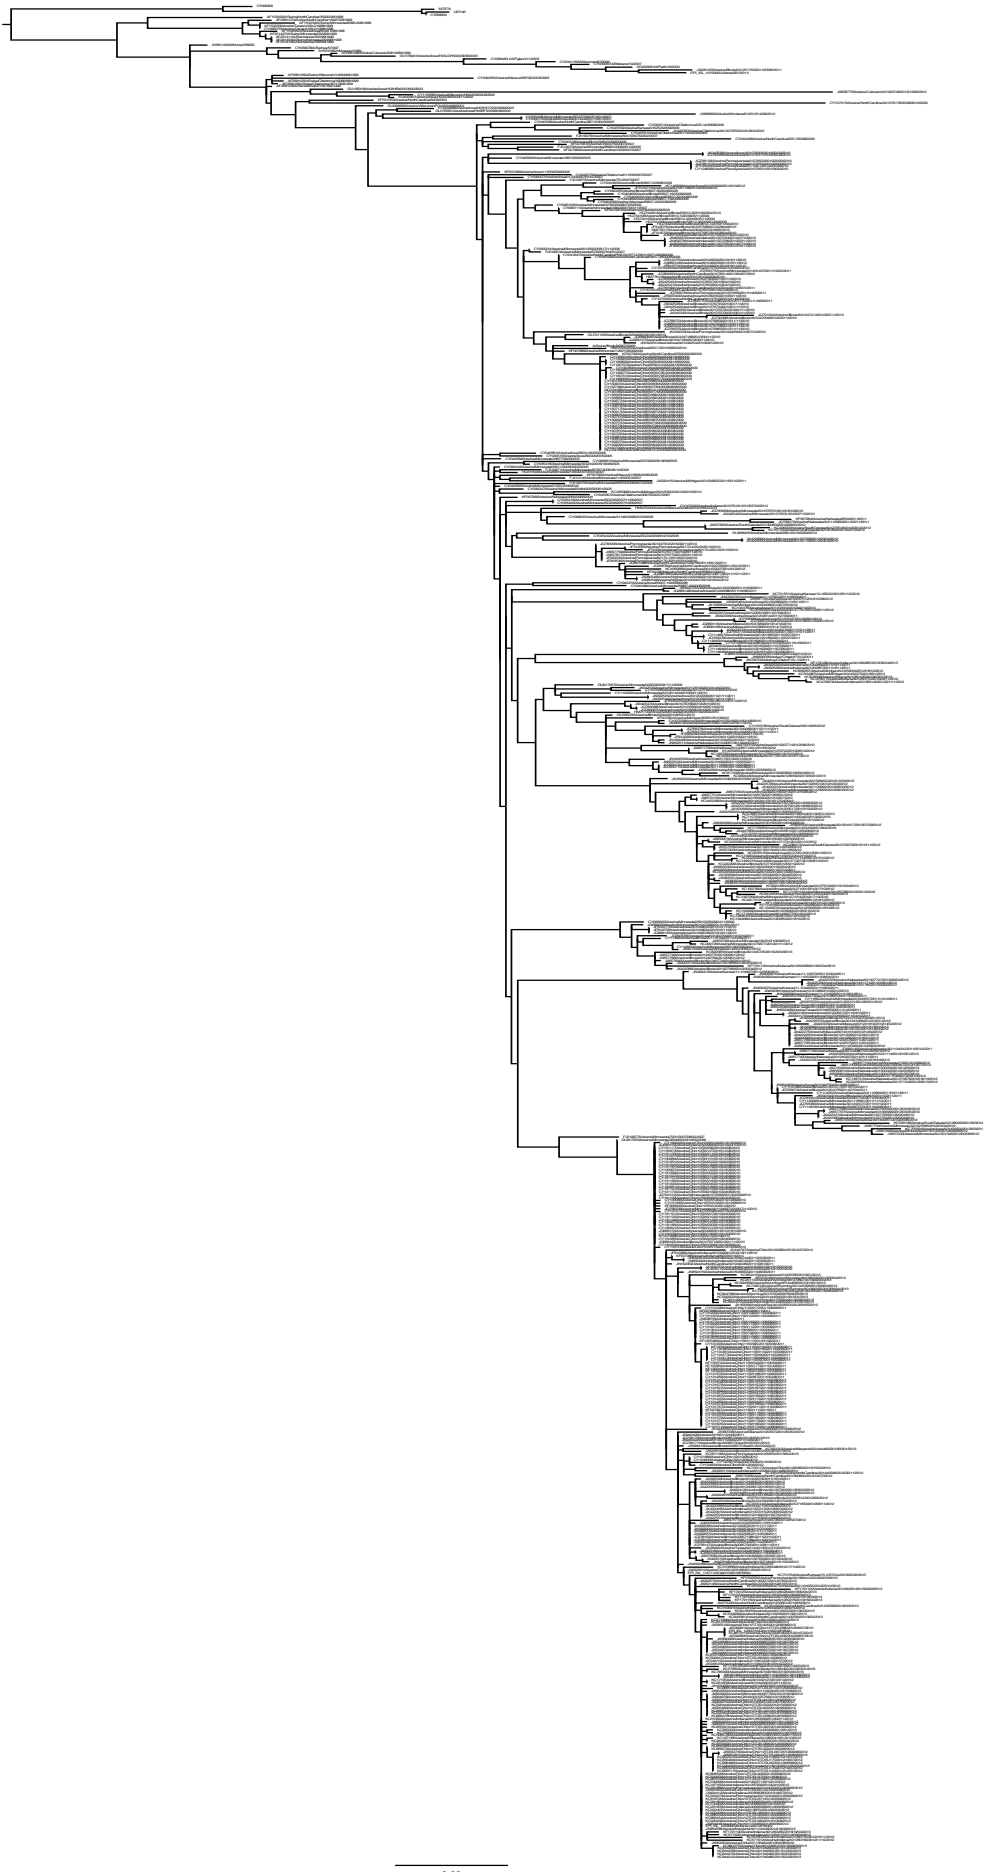

Figure S1. Phylogenetic relationships of hemagglutinin (HA) sequences from 672 swine influenza A virus isolates collected in the United States. Tree was constructed using the maximum likelihood method and a GTR+ $\Gamma$  substitution model implemented in RAxML v.7.4.2. Statistical support was estimated from 1,000 resamplings of the sequence data; data available upon request. The tree is midpoint rooted for clarity; scale bar indicates nucleotide substitutions per site.

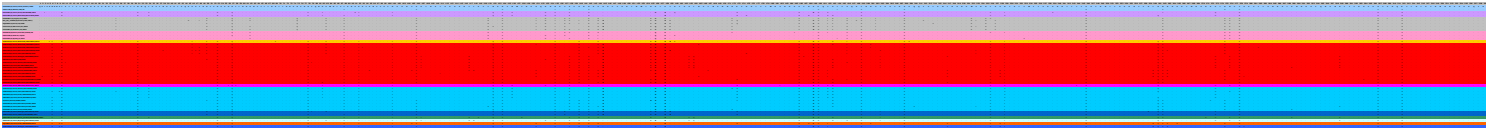

Figure S2. Amino acid sequence alignment with viruses grouped and color-coded based on antigenic cluster and marked with cluster-defining amino acid substitutions relative to the Cluster I H3 prototype.
